# Supplementary material for: Integrated multisectoral strategy to improve girls’ and women’s nutrition before conception, during pregnancy and after birth in India (Swabhimaan): protocol for a prospective, non-randomised controlled evaluation
Source: PubMed Central journal article supplement — BMJ Open. 2019 Nov 18;9(11):e031632. doi: 10.1136/bmjopen-2019-031632 (PMC6886981; doi:10.1136/bmjopen-2019-031632), 2019-11-18
Supplement: bmjopen-2019-031632supp001.pdf [file bmjopen-2019-031632supp001.pdf]

### Theory of change for Swabhimaan: Bihar, Chhattisgarh and Odisha (2016 -2021)

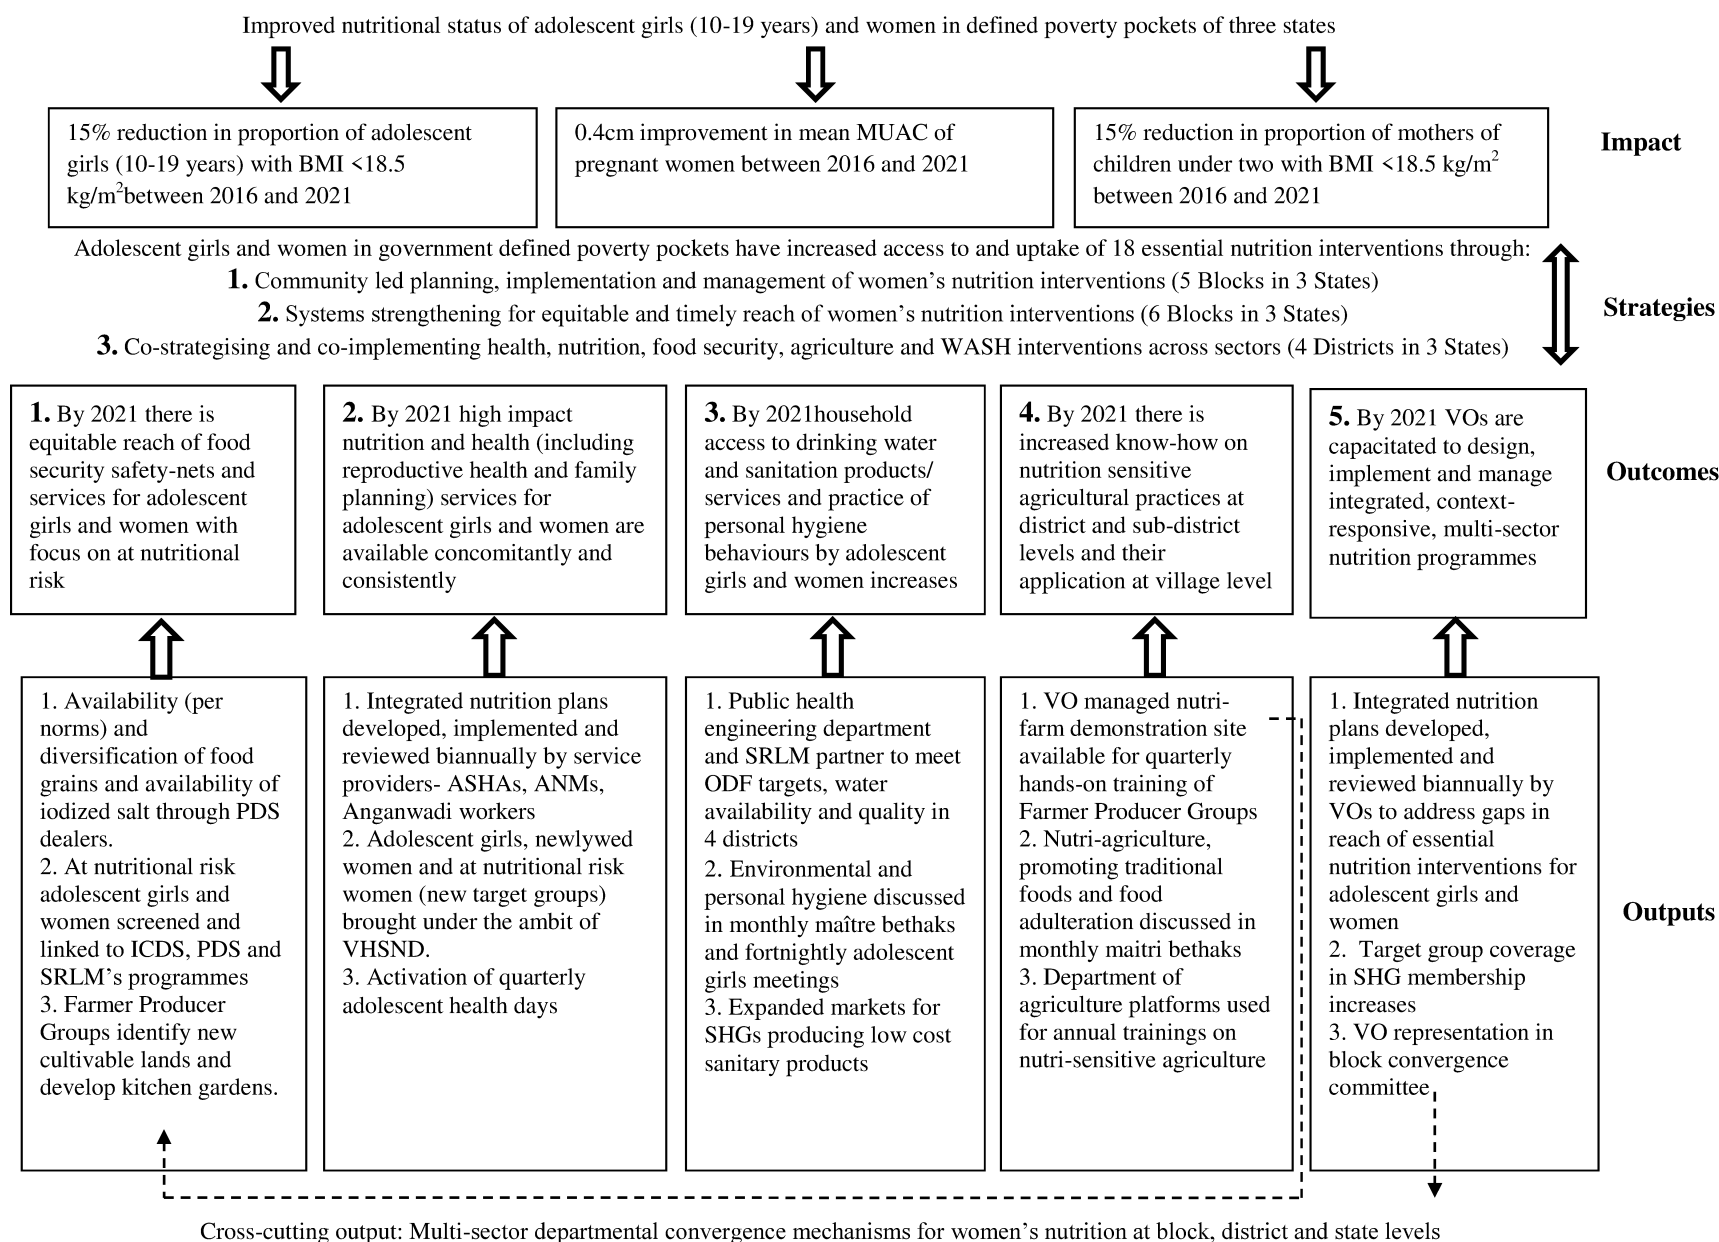

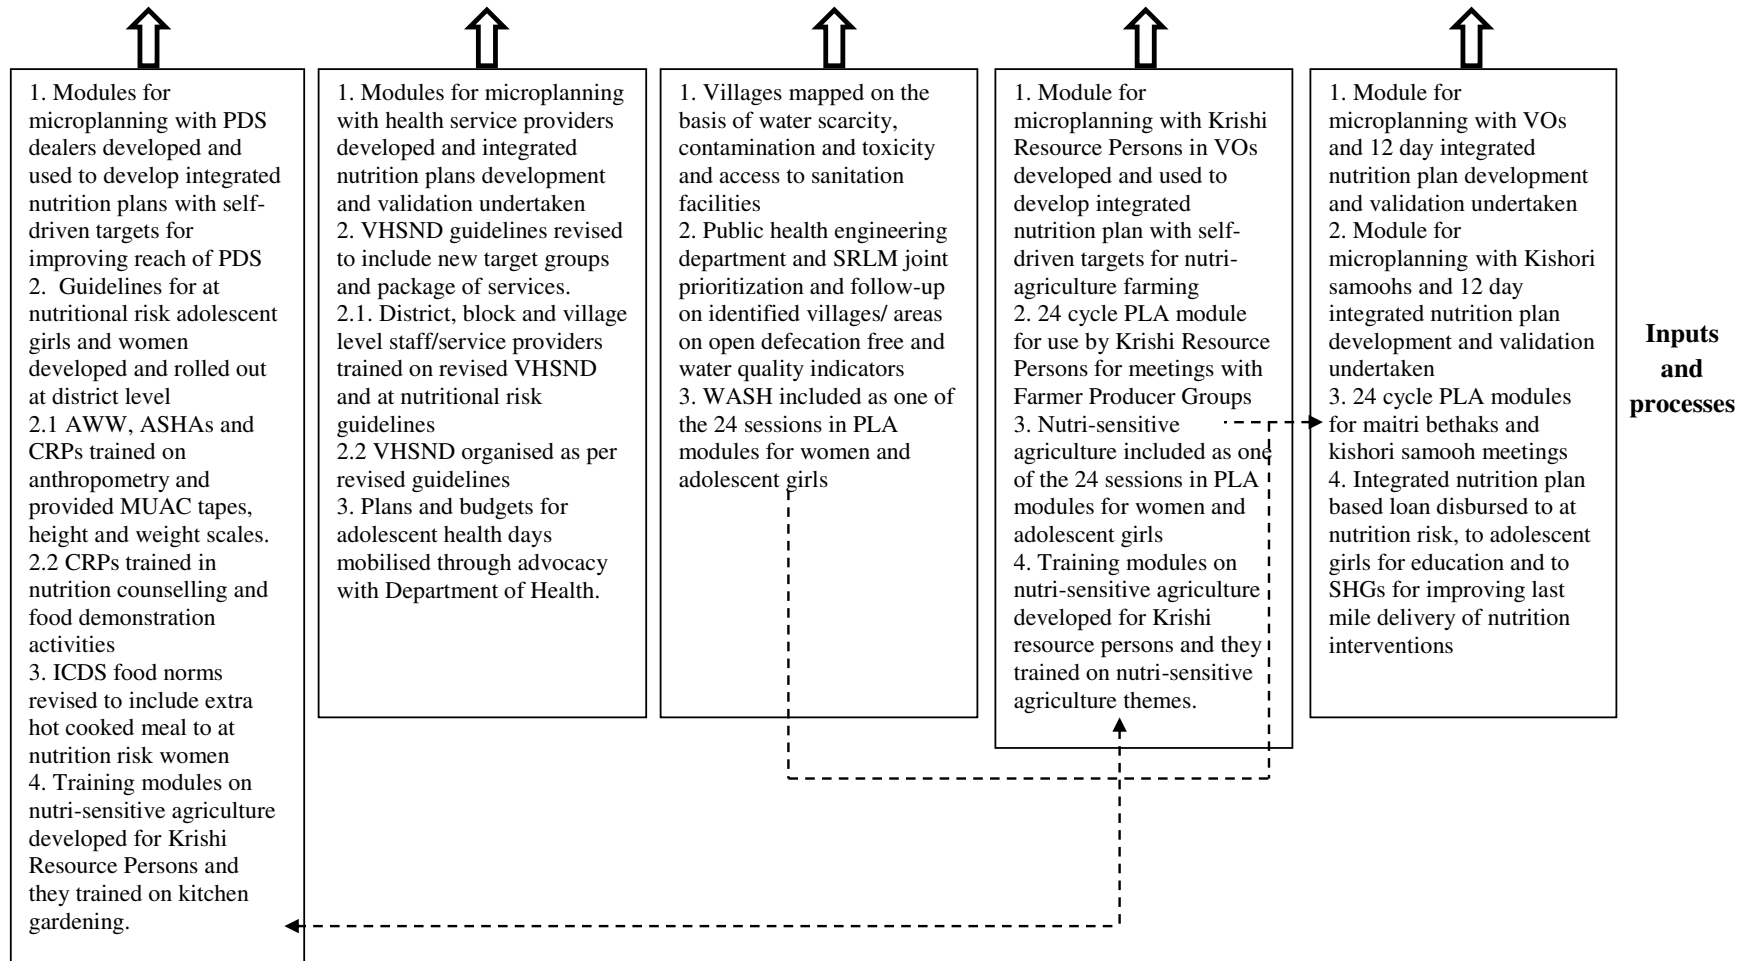

Cross-cutting input: Annual planning and review of selected nutrition indicators by a multi-sector nutrition committee at block, district and state levels
