# Supplementary material for: Integrated multisectoral strategy to improve girls’ and women’s nutrition before conception, during pregnancy and after birth in India (Swabhimaan): protocol for a prospective, non-randomised controlled evaluation
Source: PubMed Central journal article supplement — BMJ Open. 2019 Nov 18;9(11):e031632. doi: 10.1136/bmjopen-2019-031632 (PMC6886981; doi:10.1136/bmjopen-2019-031632), 2019-11-18
Supplement: bmjopen-2019-031632supp002.pdf [file bmjopen-2019-031632supp002.pdf]

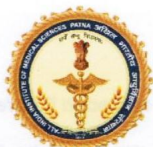

## All India Institute of Medical Sciences, Patna

### Ethics committee approval letter

Date: 23/01/2016

**Dr. Neeraj Agarwal**  
 Prof. & Head  
 Department of Community & Family Medicine  
 AIIMS, Patna

Dear Dr. Neeraj Agarwal

Ref: IEC/AIIMS/PAT/52/2016

The Institutional Ethics Committee, All India Institute of Medical Sciences, Patna reviewed & discussed your study documents entitled "**Prospective, controlled, non-randomized evaluation of a programme to improve the nutritional status of women before conception, during pregnancy and after birth in Bihar**". (The Swabhimaan Programme) dated: 19.01.2016 study code: IEC/AIIMS/PAT/52/2016 on 19.01.2016.

The following members of ethics committee were present at the meeting held on 19.01.2016 at 2:00 P.M. at Department of Community and Family Medicine, All India Institute of Medical Sciences, Patna.

| S. No. | Name and address of the EC members                                | Designation               |
|--------|-------------------------------------------------------------------|---------------------------|
| 1.     | Dr. R.N. Singh, Consultant Orthopaedic Surgeon                    | Chairman                  |
| 2.     | Dr. P.P. Gupta, HOD, Pharmacology, AIIMS, Patna                   | Member:<br>Pharmacologist |
| 3.     | Dr. Sadhana Sharma, Professor, Biochemistry, AIIMS, Patna         | Member: Basic<br>Sciences |
| 4.     | Dr. Ramji Singh, Addl. Prof. & Head, Physiology, AIIMS, Patna     | Member: Pre-<br>Clinical  |
| 5.     | Dr. Ravi Kirti, Asst. Prof., General Medicine, AIIMS, Patna       | Member: Physician         |
| 6.     | Dr. Subhash Kumar, Assit. Prof., Radio Diagnosis, AIIMS, Patna    | Member: Clinician         |
| 7.     | Mr. Binay Kumar Pandey, Advocate, Patna High Court                | Member: Legal<br>Expert   |
| 8.     | Mr. Ajit Kumar Chaudhary, Social Worker                           | Member: Social<br>Worker  |
| 9.     | Ms. Shahina Khan, Director of Raza International Group of Schools | Member:<br>Philosopher    |
| 10.    | Dr. C.M. Singh, Addl. Prof., Dept. of C&FM, AIIMS, Patna          | Member Secretary          |

Address: All India Institute of Medical Sciences, District - Patna, State - Bihar, Pin Code – 801507,  
 E-mail – [iecaimspatna@gmail.com](mailto:iecaimspatna@gmail.com)

**The IEC approves the study to be conducted in its presented form.**

Principal Investigator is responsible for fulfilling the following requirements:

- All Co-investigator must be kept informed of the status of the project.
- Any, amendment(s) to the protocol or the consent form(s), must be informed and submitted to the IEC for review and approval prior to the activation of the same. The IEC number assigned to the project should be cited in any correspondence.
- Serious Adverse Events (SAE), if any, should be reported to the IEC immediately. New information that becomes available which could change the risk-benefit ratio must be submitted promptly for IEC review.
- Records of documents related to signed consent (by subjects/witnesses) should be maintained properly for the audit by IEC.
- Approved study needs to be reviewed by IEC AIIMS Patna periodically at least once in a year as appropriate.
- After completion of the permitted tenure of the study, submission of the study report to the IEC AIIMS Patna is mandatory.
- A continuing review application must be submitted to the IEC in order to continue the study beyond the approved period. Failure to submit the same will result in the termination of the study.
- IEC AIIMS Patna will maintain the confidentiality of all the approved studies and will share the information with authentic bodies only on justification of the request.

Yours sincerely

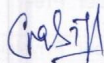

Member Secretary  
IEC, AIIMS, Patna

**MEMBER SECRETARY  
INSTITUTIONAL ETHICS COMMITTEE  
AIIMS, PATNA**

---

Address: All India Institute of Medical Sciences, District - Patna, State - Bihar, Pin Code – 801507,  
E-mail – [iecaiimspatna@gmail.com](mailto:iecaiimspatna@gmail.com)
